# Supplementary material for: Process evaluation of the New Interventions for independence in Dementia Study (NIDUS) Family stream randomised controlled trial: protocol
Source: PubMed Central journal article supplement (PMC9185390; doi:10.1136/bmjopen-2021-054613), 2022-06-08
Supplement: bmjopen-2021-054613supp001.pdf [file bmjopen-2021-054613supp001.pdf]

## Appendix A

**Alignment of planning, design and analysis of the NIDUS-Family process evaluation with MRC guidance.**

| Phase     | MRC guideline recommendations (Moore et al, 2015)                                                                                                                                                                                                                                                                                                                                    | Consideration of the recommendations for NIDUS-Family process evaluation                                                                                                                                                                                                                                                                                                                          |
|-----------|--------------------------------------------------------------------------------------------------------------------------------------------------------------------------------------------------------------------------------------------------------------------------------------------------------------------------------------------------------------------------------------|---------------------------------------------------------------------------------------------------------------------------------------------------------------------------------------------------------------------------------------------------------------------------------------------------------------------------------------------------------------------------------------------------|
| Planning  | Define parameters of relationships of evaluators with intervention developers or implementers, balancing needs for good working relationships and independence; and how evaluators will inform implementation.                                                                                                                                                                       | <ul style="list-style-type: none"> <li>• Process evaluation led by a separate University.</li> <li>• Evaluator is associate staff member at the trial University.</li> <li>• NIDUS facilitators are employed through the intervention.</li> <li>• Findings will inform the post-trial implementation strategy. They will not feed into the ongoing trial.</li> </ul>                              |
|           | Ensure the research team has the correct expertise, including, qualitative and quantitative research methods, and inter-disciplinary theoretical expertise.                                                                                                                                                                                                                          | Multi-disciplinary team includes expertise in psychology (ageing and behavioural change), old age psychiatry and dementia, neuropsychology, health service process evaluations, qualitative, quantitative, and mixed methods.                                                                                                                                                                     |
|           | Process and outcome evaluation team's degree of separation or integration: <ul style="list-style-type: none"> <li>• Oversight by a principal investigator.</li> <li>• Good communication systems.</li> <li>• Integration plans for process and outcome data agreed from the outset.</li> </ul>                                                                                       | <ul style="list-style-type: none"> <li>• Principal investigator has oversight over the NIDUS-Trial and is a subsidiary supervisor for evaluation lead.</li> <li>• Evaluation is independent to the NIDUS-Family trial, but with weekly communication.</li> <li>• Integration of process and outcome data will feed into the implementation study and strategy, but not into the trial.</li> </ul> |
| Designing | Describe the intervention and its causal assumptions.                                                                                                                                                                                                                                                                                                                                | <ul style="list-style-type: none"> <li>• The NIDUS-Family theory and causal assumptions are represented in a logic model (Figure 3).</li> <li>• Section 1.1 describes the intervention, and 1.4 describes the causal assumptions</li> </ul>                                                                                                                                                       |
|           | <ul style="list-style-type: none"> <li>• Identify questions by considering the intervention.</li> <li>• Agree scientific and policy priority questions by considering the evidence for intervention assumptions.</li> <li>• Consult with the evaluation team and policy/practice stakeholders.</li> <li>• Identify previous process evaluations of similar interventions.</li> </ul> | <ul style="list-style-type: none"> <li>• The logic model informed the evaluation research questions.</li> <li>• The multi-disciplinary team, including PPI, were consulted on the logic model.</li> <li>• Relevant process evaluations were identified through a systematic review (PROSPERO ID: CRD42020221337).</li> </ul>                                                                      |
|           | <ul style="list-style-type: none"> <li>• Use quantitative methods to quantify key process variables and allow testing of pre-hypothesised</li> </ul>                                                                                                                                                                                                                                 | <ul style="list-style-type: none"> <li>• Quantitative and qualitative methods will build upon one another to test, refine, and develop the NIDUS-Family</li> </ul>                                                                                                                                                                                                                                |

|                 |                                                                                                                                                                                                                                                                                                                                                                                                                                                                                                                                                                      |                                                                                                                                                                                                                                                                                                                                                                                                                                                                                                                                                                                                                                                                                                                                                                                                                                                                                                                        |
|-----------------|----------------------------------------------------------------------------------------------------------------------------------------------------------------------------------------------------------------------------------------------------------------------------------------------------------------------------------------------------------------------------------------------------------------------------------------------------------------------------------------------------------------------------------------------------------------------|------------------------------------------------------------------------------------------------------------------------------------------------------------------------------------------------------------------------------------------------------------------------------------------------------------------------------------------------------------------------------------------------------------------------------------------------------------------------------------------------------------------------------------------------------------------------------------------------------------------------------------------------------------------------------------------------------------------------------------------------------------------------------------------------------------------------------------------------------------------------------------------------------------------------|
|                 | <p>mechanisms of impact and contextual moderators.</p> <ul style="list-style-type: none"> <li>• Use qualitative methods to capture emerging changes in implementation, experiences of the intervention and unanticipated or complex causal pathways, and to generate new theory.</li> <li>• Balance collection of data on key process variables from all sites or participants, with detailed case studies of purposively selected samples.</li> <li>• Consider data collection at multiple time points to capture changes to the intervention over time.</li> </ul> | <p>logic model and emerging theory model (Figure 4).</p> <ul style="list-style-type: none"> <li>• Quantitative methods will capture population level data on acceptability, reach, dose, attrition and secondary trial measures (approx. n=199). Quantitative observation data (approx. n=30) will enable detailed dyadic case-studies</li> <li>• Qualitative interviews with purposively sampled dyads using GAS ratings (approx. N=30) will capture dyads experiences of receiving the intervention for case-studies and theme generation.</li> <li>• Quantitative and qualitative methods will be matched on construct.</li> <li>• Purposive sampling will recruit a sample representative of the trial population.</li> <li>• Participants who withdraw will complete a questionnaire or an interview.</li> <li>• Data collection at post 12-month follow-up for dyads and throughout for facilitators.</li> </ul> |
| <b>Analysis</b> | Provide descriptive quantitative information on fidelity, dose and reach.                                                                                                                                                                                                                                                                                                                                                                                                                                                                                            | <p>Fidelity: Fidelity checklist ratings for 20% of intervention-arm participants</p> <p>Dose: number of sessions</p> <p>Reach: Sites and locations</p> <p>Attrition: Rate of withdrawal</p>                                                                                                                                                                                                                                                                                                                                                                                                                                                                                                                                                                                                                                                                                                                            |
|                 | modelling of variations between participants or sites for factors such as fidelity or reach.                                                                                                                                                                                                                                                                                                                                                                                                                                                                         | Contextual factors related to demographic data will be factored into data analysis and integration.                                                                                                                                                                                                                                                                                                                                                                                                                                                                                                                                                                                                                                                                                                                                                                                                                    |
|                 | Integrate quantitative process data into outcomes datasets, examining whether effects differ by implementation or pre-specified contextual moderators, and test hypothesised mediators.                                                                                                                                                                                                                                                                                                                                                                              | Secondary trial data, dyadic observation fidelity checklist data, and acceptability ratings will be integrated to understand factors relating to high and low goal attainment.                                                                                                                                                                                                                                                                                                                                                                                                                                                                                                                                                                                                                                                                                                                                         |
|                 | Collect and analyse qualitative data iteratively so that themes that emerge in early interviews can be explored in later ones.                                                                                                                                                                                                                                                                                                                                                                                                                                       | Qualitative data collection and analysis will be carried out iteratively as dyads finish their 12-month follow-up. Emerging themes from earlier interviews will be explored in later interviews.                                                                                                                                                                                                                                                                                                                                                                                                                                                                                                                                                                                                                                                                                                                       |
|                 | quantitative and qualitative analyses build upon one another, with qualitative data used to explain                                                                                                                                                                                                                                                                                                                                                                                                                                                                  | A two-stage integration approach will be used to merge the findings, initially at the                                                                                                                                                                                                                                                                                                                                                                                                                                                                                                                                                                                                                                                                                                                                                                                                                                  |

|  |                                                                                                                                                                              |                                                                                                                                          |
|--|------------------------------------------------------------------------------------------------------------------------------------------------------------------------------|------------------------------------------------------------------------------------------------------------------------------------------|
|  | quantitative findings, and quantitative data used to test hypotheses generated by qualitative data.                                                                          | level of the dyad, then at the population level.                                                                                         |
|  | Initially analyse and report qualitative process data prior to knowing trial outcomes to avoid biased interpretation.                                                        | Qualitative data will be collected and analysed before trial outcomes are known.                                                         |
|  | Report whether process data are being used to generate hypotheses (analysis blind to trial outcomes), or for post-hoc explanation (analysis after trial outcomes are known). | Process data will be used to generate hypotheses, analysis will be blind to primary trial outcomes. Secondary outcomes will be analysed. |

Note. Adapted from Moore et al (2015, p12)
