# Supplementary material for: Process evaluation of the New Interventions for independence in Dementia Study (NIDUS) Family stream randomised controlled trial: protocol
Source: PubMed Central journal article supplement (PMC9185390; doi:10.1136/bmjopen-2021-054613), 2022-06-08
Supplement: bmjopen-2021-054613supp005.pdf [file bmjopen-2021-054613supp005.pdf]

## Appendix E

**Observation/ Fidelity Checklist**

For fidelity checklist only complete italicised sections. Complete all sections for process evaluation observations.

| Process evaluation factors                                                                                                                                   | Please rate<br>1 Strongly disagree, 2 disagree, 3 neither agree nor disagree, 4 agree, 5 strongly agree | Examples – include descriptive text or quotations to demonstrate related observations<br>(Free text) |
|--------------------------------------------------------------------------------------------------------------------------------------------------------------|---------------------------------------------------------------------------------------------------------|------------------------------------------------------------------------------------------------------|
| <b>Values and approaches (CA1.1, 1.2, 1.3, 2.1, 2.2, 5, 8)</b>                                                                                               |                                                                                                         |                                                                                                      |
| <i>[facilitator/PLWD/ Carer] paid attention (are they focused) in the session. [Fidelity checklist]</i>                                                      | For PLWD:<br>For Carer:<br>Facilitator:                                                                 |                                                                                                      |
| [facilitator/PLWD/ Carer] were engaged (actively contributed, followed the discussions) in the session.                                                      | For PLWD:<br>For Carer:<br>Facilitator:                                                                 |                                                                                                      |
| [facilitator/PLWD/ Carer] contributed to discussions.                                                                                                        | For PLWD:<br>For Carer:<br>Facilitator:                                                                 |                                                                                                      |
| The facilitator promoted choice (CA1.1).                                                                                                                     | For PLWD:<br>For Carer:<br>Overall:                                                                     |                                                                                                      |
| Discussions were respectful (allowing others to speak, supporting their opinions, working as partners, discussing differing opinions calmly - CA1.1, 1.2 8). | Between PLWD and carer:<br>Between PLWD and facilitator:<br>Between carer and facilitator:<br>Overall   |                                                                                                      |
| [PLWD/ Carer] had opportunities to ask questions.                                                                                                            | PLWD:<br>Carer:                                                                                         |                                                                                                      |
| [PLWD/ Carer] contributed to decision making (CA1.3)                                                                                                         | For PLWD:<br>For Carer:<br>Overall:                                                                     |                                                                                                      |
| [PLWD/ Carer] had opportunities for meaningful engagement (able to actively participate, actively contribute ideas, skills or abilities) for PLWD (CA1.1)    | For PLWD:<br>For Carer:                                                                                 |                                                                                                      |
| [facilitator/Carer] showed compassion (did they take time to bond, act with kindness, be encouraging, be polite - CA2.1)?                                    | Facilitator to PLWD:<br>Carer to PLWD:<br>Facilitator to carer:                                         |                                                                                                      |
| [facilitator/PLWD/ Carer] explored risks (CA2.2).                                                                                                            | For PLWD:<br>For Carer:<br>For facilitator:<br>Overall:                                                 |                                                                                                      |

|                                                                                             |                                     |                                                     |
|---------------------------------------------------------------------------------------------|-------------------------------------|-----------------------------------------------------|
| the facilitator tailored [PLWD/ Carer] needs/goals/plans/activities/tasks (CA8).            | For PLWD:<br>For Carer:<br>Overall: | Needs:<br>Goals:<br>Plans:<br>Activities:<br>Tasks: |
| [facilitator/PLWD/ Carer] agreed (acknowledged) next steps (actions to follow the session). | PLWD:<br>Carer:<br>Facilitator:     |                                                     |
| Did the [PLWD/carer] acknowledge/ take ownership for the actions/tasks set?                 | PLWD:<br>Carer:                     |                                                     |
| <b>Goals (CA6.1, 6.2, 6.3) and Strategies (CA7, 3, 4)</b>                                   |                                     |                                                     |
| Goals were discussed.                                                                       |                                     | Which goals?                                        |
| Modules were discussed in line/ linked with the dyad's goals.                               |                                     | Which modules?                                      |
| Clear objectives/ next steps were set [for PLWD/Carer].                                     | For PLWD:<br>For carer              |                                                     |
| The facilitator kept the [PLWD/Carer] focused on the module/goal.                           |                                     |                                                     |
| <b>Overall</b>                                                                              |                                     |                                                     |
| The group was relaxed.                                                                      |                                     |                                                     |
| The facilitator kept the [PLWD/carer] engaged in the session.                               | PLWD:<br>Carer                      |                                                     |
| The facilitator kept the [PLWD/ carer] focused on the manual/goals.                         | PLWD:<br>Carer:                     |                                                     |
| The facilitator kept the session to time.                                                   |                                     |                                                     |

**Any additional notes on the relationship dynamics between the:**

- Facilitator and PLWD
- Facilitator and carer
- PLWD and carer (Free text)

|                                                                                                                                   |
|-----------------------------------------------------------------------------------------------------------------------------------|
| <b>Any additional notes on the session (Free text)</b>                                                                            |
|                                                                                                                                   |
| <b><i>Any additional notes on impact of COVID-19 on delivery (Free text) [Fidelity checklist]</i></b>                             |
|                                                                                                                                   |
| <b><i>Any additional notes for modifications to the intervention or facilitator training (Free text) [Fidelity checklist]</i></b> |
|                                                                                                                                   |
