# Supplementary material for: Process evaluation of the New Interventions for independence in Dementia Study (NIDUS) Family stream randomised controlled trial: protocol
Source: PubMed Central journal article supplement (PMC9185390; doi:10.1136/bmjopen-2021-054613), 2022-06-08
Supplement: bmjopen-2021-054613supp006.pdf [file bmjopen-2021-054613supp006.pdf]

## APPENDIX F

**Acceptability Questionnaire for Family Carers**

Family carer ID -----

Person living with dementia ID: -----

GAS scores: -----

NIDUS-Family acceptability scale: Family carer (Please tick the box you feel is the most relevant answer related to the question, rating from strongly disagree to strongly agree)

| Statement                                                                                                                                                      |                       | Strongly disagree | Disagree | Neither agree nor disagree | Agree | Strongly agree |
|----------------------------------------------------------------------------------------------------------------------------------------------------------------|-----------------------|-------------------|----------|----------------------------|-------|----------------|
| The intervention helped the person I care for.                                                                                                                 |                       |                   |          |                            |       |                |
| [I/ the person I care for] contributed to decision-making.                                                                                                     | Myself (family carer) |                   |          |                            |       |                |
|                                                                                                                                                                | The person I care for |                   |          |                            |       |                |
| [I/ the person I care for] had opportunities for meaningful engagement ( <i>able to actively participate, actively contribute ideas, skills or abilities</i> ) | Myself (family carer) |                   |          |                            |       |                |
|                                                                                                                                                                | The person I care for |                   |          |                            |       |                |
| Goals were tailored to [my/ the person I care for] needs.                                                                                                      | Myself (family carer) |                   |          |                            |       |                |
|                                                                                                                                                                | The person I care for |                   |          |                            |       |                |
| The modules helped [me/ the person I care for] work towards my goals.                                                                                          | Myself (family carer) |                   |          |                            |       |                |
|                                                                                                                                                                | The person I care for |                   |          |                            |       |                |
| [myself/ the person I care for] had a good relationship with my facilitator.                                                                                   | Myself (family carer) |                   |          |                            |       |                |
|                                                                                                                                                                | The person I care for |                   |          |                            |       |                |
| The intervention helped improve my relationship with the person I care for.                                                                                    |                       |                   |          |                            |       |                |

What feedback do you have for us about your experiences of receiving the NIDUS-Family intervention?

.....

..... **[Please turn over for more space]**
