# Supplementary material for: Process evaluation of the New Interventions for independence in Dementia Study (NIDUS) Family stream randomised controlled trial: protocol
Source: PubMed Central journal article supplement (PMC9185390; doi:10.1136/bmjopen-2021-054613), 2022-06-08
Supplement: bmjopen-2021-054613supp007.pdf [file bmjopen-2021-054613supp007.pdf]

**Appendix G*****Withdrawal Questionnaire***

Family carer ID -----

Person living with dementia ID: -----

**What was the reason(s) you withdrew?****Would you do anything differently?****What would you change?**

|                                  |
|----------------------------------|
|                                  |
| <b><u>Any other comments</u></b> |
|                                  |
